# Supplementary material
Source: Springer Nature journal article supplement (https://www.springermedizin.de/resource/supplementary/12879_2012_2198_MOESM1_ESM.pdf/9443834)

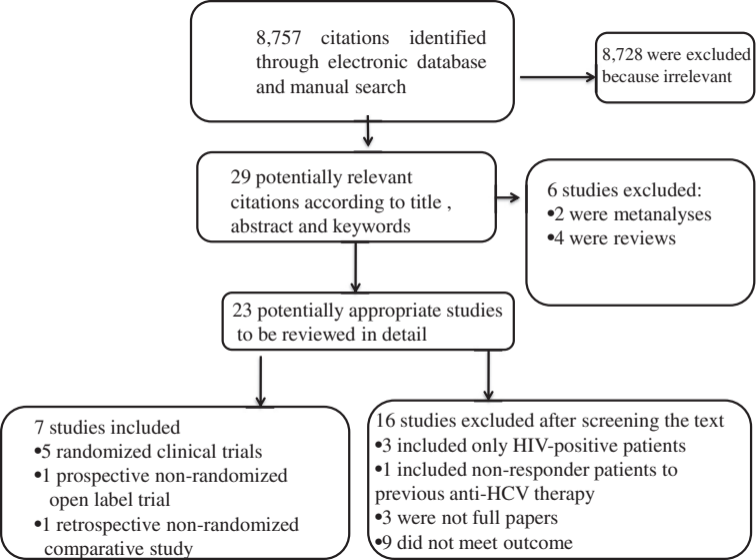

Supplement: MOESM1 [file 9443834]
